# Supplementary material for: Punishment Induces Secondary Cooperation within Structured Populations Facing Social Dilemmas
Source: Research Square preprint supplement (doi:10.21203/rs.3.rs-7118558/v1), 2025-08-21
Supplement: Supplementary file 1 [file 635afacae4a337cf36f5da77.pdf]

# **Supplementary Information: Punishment Induces Secondary Cooperation within Structured Populations Facing Social Dilemmas**

Huo Wei<sup>1,3</sup>   Juyi Li<sup>2,3</sup> \*   Qi Su<sup>2</sup> †

<sup>1</sup>School of Mathematics and Statistics, Wuhan University, Wuhan, 430072, China

<sup>2</sup> Department of Automation, Shanghai Jiao Tong University, Shanghai, 200240, China

<sup>3</sup>These authors contributed equally to this work.

---

\*Correspondence: 2020202010069@whu.edu.cn

†Correspondence: qisu@sjtu.edu.cn

1 **Contents**

|    |                                                                                      |           |
|----|--------------------------------------------------------------------------------------|-----------|
| 2  | <b>1 Stochastic dynamics of higher-order interactions in finite populations</b>      | <b>3</b>  |
| 3  | 1.1 Evolutionary process Modeling . . . . .                                          | 4         |
| 4  | 1.2 Applications in three strategies . . . . .                                       | 6         |
| 5  | 1.3 Stationary Distribution Analysis . . . . .                                       | 8         |
| 6  | <b>2 Replicator dynamics in higher-order interactions with punishment mechanisms</b> | <b>9</b>  |
| 7  | 2.1 Governing equation derivation . . . . .                                          | 9         |
| 8  | 2.2 Stability criteria and phase transitions . . . . .                               | 10        |
| 9  | <b>3 Replicator Dynamics in Two-Population Games under Higher-Order Interactions</b> |           |
| 10 | <b>and Punishment Mechanisms</b>                                                     | <b>20</b> |

# 1 Stochastic dynamics of higher-order interactions in finite populations

We consider a finite population system consisting of  $Z$  players who participate simultaneously in  $M$  distinct games. Each game may involve pairwise (low-order) or multi-player (higher-order) interactions. Each player adopts a strategy from a finite set  $S = \{S_1, S_2, \dots, S_N\}$ . Let  $X_k \in \mathbb{N}$  represent the number of players choosing strategy  $S_k$ , with the constraint  $\sum_{i=1}^N X_i = Z$ . To model these interactions, we consider the hypergraph  $\mathcal{H}(\mathcal{V}, \mathcal{E})$ , where the vertex set  $\mathcal{V}$ , with  $|\mathcal{V}| = Z$ , represents the  $Z$  players, and the hyperedge set  $\mathcal{E}$ , with  $|\mathcal{E}| = M$  corresponds to the  $M$  games. Each hyperedge  $e_g$ , for  $g \in \{1, \dots, M\}$ , specifies a distinct game involving two or more participants. And the size of each hyperedge  $e_g$  is  $q_g = |e_g| = \sum_{i=1}^Z b_{ig}$ , which captures the number of participants in the game  $g$ . This hypergraph structure is encoded by a  $Z \times M$  incidence matrix  $\mathcal{B} = (b_{ig})$ , where  $b_{ig} = 1$  if the player  $i$  participates in the game  $g$ , and  $b_{ig} = 0$  otherwise. The hyperdegree of a player  $i$  is defined as  $k_i = \sum_{g=1}^M b_{ig}$ , representing the number of games that the player joins. Accordingly, the average hyperdegree in the population is given by  $\langle k \rangle = \frac{1}{Z} \sum_{i=1}^Z k_i$ .

Specifically, in contexts characterized by frequent interactions among individuals, cumulative payoffs depend predominantly on the frequency distribution of strategies within the population. For instance, considering a well-mixed population composed of  $j$  cooperators and  $N - j$  defectors in social dilemmas, the cumulative payoffs for cooperators ( $\pi_C$ ) and defectors ( $\pi_D$ ) are given respectively by

$$\pi_C = (j - 1)R + (N - j)S \text{ and } \pi_D = jT + (N - j - 1)P,$$

where  $R$ ,  $S$ ,  $T$ , and  $P$  are the standard payoff parameters defining the underlying game dynamics [1, 2]. However, in scenarios with higher-order interactions, cumulative payoffs for individuals in such high-order structures must incorporate contributions from group interactions beyond pairs, considering the frequency and size of interaction groups (hyperedges). Thus, under higher-order interactions, cumulative payoffs become explicitly dependent on the proportion and composition of hyperedges, and can be generalized as

$$\pi_{S_i} = \sum_k \rho_k \sum_{e_g \in \mathcal{G}_k} \Pi_{S_i}(e_g),$$

where  $\rho_k$  denotes the proportion of hyperedges of order  $k$ ,  $\mathcal{G}_k$  represents the set of all hyperedges of size  $k$  involving the focal player, and  $\Pi_{S_i}(e_g)$  denotes the payoff of the focal player when interacting within the hyperedge  $e_g$ .

## 1.1 Evolutionary process Modeling

At each time step, an individual is randomly selected from the population as the focal player. Subsequently, another individual is randomly chosen from among the neighbors of the focal player in a hypergraph, where connections are defined by hyperedges of varying sizes. During each interaction, the focal player's payoff depends on its own strategy as well as the strategies of the other participants in the relevant hyperedge.

Following this interaction, the focal player updates its strategy according to the following rule. With probability  $\mu$ , the focal player's current strategy, denoted by  $S_i$ , undergoes a mutation process, whereby it is replaced by an alternative strategy selected randomly from the set of all available strategies. With probability  $1 - \mu$ , the focal player attempts to imitate the neighbor's strategy  $S_j$ , adopting it with the probability given by the Fermi function:

$$p = \frac{1}{1 + \exp[-\omega(\pi_{S_j} - \pi_{S_i})]}.$$

Here,  $\pi_{S_i}$  and  $\pi_{S_j}$  represent the cumulative payoffs obtained by the focal player and the selected neighbor, respectively, while  $\omega \geq 0$  characterizes the intensity of selection. Under strong selection ( $\omega \rightarrow \infty$ ), the imitation probability  $p$  converges to a deterministic outcome: it becomes  $p = 1$  or  $p = 0$ , depending on the sign of the payoff difference. In contrast, under weak selection ( $\omega \rightarrow 0$ ), the probability of imitation converges to  $1/2$ , reflecting an unbiased and random decision.

We define  $T_i^\pm(\mathbf{X})$  as the probability that the number of players employing strategy  $S_i$  increases (+) or decreases (−) by one when the system is in state  $\mathbf{X} = (X_1, X_2, \dots, X_N)$ . It should be noted that, as previously defined, each  $X_i$  denotes the number of individuals who select the strategy  $S_i$ . Specifically, the probability of an increase in the number of players adopting  $S_i$  is given by the sum

$$T_i^+(\mathbf{X}) = \sum_{j, j \neq i} T_{ij}^+(\mathbf{X}),$$

where  $T_{ij}^+(\mathbf{X})$  denotes the probability that the number of players adopting  $S_i$  increases by one while that of players adopting  $S_j$  decreases by one. This probability is expressed as

$$T_{ij}^+(\mathbf{X}) = (1 - \mu) \frac{1}{1 + \exp[-\omega(\pi_{S_i} - \pi_{S_j})]} \frac{X_i}{Z} \frac{X_j}{Z} + \mu \frac{X_j}{(N - 1)Z}.$$

Similarly, the probability that the number of players adopting  $S_i$  decreases by one is given by

$$T_i^-(\mathbf{X}) = \sum_{j, j \neq i} T_{ij}^-(\mathbf{X}),$$

65 with

$$T_{ij}^-(\mathbf{X}) = (1 - \mu) \frac{1}{1 + \exp[\omega(\pi_{S_i} - \pi_{S_j})]} \frac{X_i}{Z} \frac{X_j}{Z} + \mu \frac{X_i}{(N-1)Z}.$$

66 Indeed, the probability density function,  $P^\tau(\mathbf{X})$ , i.e. the prevalence of each state at time  $\tau$ ,  
 67 evolves in time according to the master equation [3]

$$\begin{aligned} & P^{\tau+1}(\mathbf{X}) - P^\tau(\mathbf{X}) \\ &= \sum_i \sum_{j, j \neq i} P^\tau(X_1, \dots, X_i - 1, \dots, X_j + 1, \dots, X_N) T_{ij}^+(X_1, \dots, X_i - 1, \dots, X_j + 1, \dots, X_N) \\ &+ \sum_i \sum_{j, j \neq i} P^\tau(X_1, \dots, X_i + 1, \dots, X_j - 1, \dots, X_N) T_{ij}^-(X_1, \dots, X_i + 1, \dots, X_j - 1, \dots, X_N) \\ &- \sum_i \sum_{j, j \neq i} P^\tau(\mathbf{X}) T_{ij}^-(\mathbf{X}) - \sum_i \sum_{j, j \neq i} P^\tau(\mathbf{X}) T_{ij}^+(\mathbf{X}) \end{aligned} \quad (1)$$

68 Introducing the notation  $x_i = \frac{X_i}{Z}$ ,  $t = \frac{\tau}{Z}$  and the probability density  $\rho(\mathbf{x}, t) = Z P^\tau(\mathbf{X})$ , we have

$$\begin{aligned} & \rho(\mathbf{x}, t + Z^{-1}) - \rho(\mathbf{x}, t) \\ &= \sum_i \sum_{j, j \neq i} \rho(x_1, \dots, x_i - Z^{-1}, \dots, x_j + Z^{-1}, \dots, x_N, t) T_{ij}^+(x_1, \dots, x_i - Z^{-1}, \dots, x_j + Z^{-1}, \dots, x_N) \\ &+ \sum_i \sum_{j, j \neq i} \rho(x_1, \dots, x_i + Z^{-1}, \dots, x_j - Z^{-1}, \dots, x_N, t) T_{ij}^-(x_1, \dots, x_i + Z^{-1}, \dots, x_j - Z^{-1}, \dots, x_N) \\ &- \sum_i \sum_{j, j \neq i} \rho(\mathbf{x}, t) T_{ij}^-(\mathbf{x}) - \sum_i \sum_{j, j \neq i} \rho(\mathbf{x}, t) T_{ij}^+(\mathbf{x}). \end{aligned}$$

69 Here  $\mathbf{x} = (x_1, x_2, \dots, x_N)$  and  $\sum_{i=1}^N x_i = 1$ . For  $Z \gg 1$ , applying Taylor expansion to the  
 70 probability densities and the transition probabilities yields

$$\frac{d\rho(\mathbf{x}, t)}{dt} = - \sum_{i=1}^N \frac{\partial}{\partial x_i} (A_i(\mathbf{x}) \rho(\mathbf{x}, t)) + \frac{1}{2} \sum_{i,j=1}^N \frac{\partial^2}{\partial x_i \partial x_j} (B_{ij}(\mathbf{x}) \rho(\mathbf{x}, t)). \quad (2)$$

71 The drift vector  $A(\mathbf{x})$ , which characterizes the deterministic component of evolutionary dynam-  
 72 ics, is defined as

$$A_i(\mathbf{x}) = \sum_{j, j \neq i} (T_{ij}^+(\mathbf{x}) - T_{ij}^-(\mathbf{x})). \quad (3)$$

73 Correspondingly, the diffusion matrix  $B(\mathbf{x})$ , which captures the stochastic fluctuations inherent  
 74 in evolutionary dynamics, is expressed as

$$B_{ij}(\mathbf{x}) = \frac{1}{Z} \left[ \delta_{ij} \sum_k (T_{ik}^+(\mathbf{x}) + T_{ik}^-(\mathbf{x})) - (T_{ij} + T_{ji}) \right]. \quad (4)$$

75 Here, the Kronecker delta  $\delta_{ij}$  denotes the identity indicator (with  $\delta_{ij} = 1$  if  $i = j$ , and 0 other-

wise). For large but finite  $Z$ , Eq. (2) has the form of a Fokker-Planck equation, which has an equivalent Langevin equation

$$\dot{\mathbf{x}} = A(\mathbf{x}) + \Sigma(\mathbf{x})\xi$$

where  $B = \Sigma\Sigma^T$  and  $\xi$  is Gaussian noise. In fact, this is a coupled system, and the evolution equations can be described by the first  $N - 1$  equations.

## 1.2 Applications in three strategies

In this subsection, we investigate evolutionary dynamics on random hypergraphs consisting of both pairwise and three-player interactions. Specifically, we consider hypergraphs of size  $Z$ , comprising  $n_1$  two-player interactions and  $n_2$  three-player group interactions. The hypergraph structure is characterized by the average hyperdegree  $\langle k \rangle = \frac{1}{Z} \sum_{i=1}^Z k_i$ , indicating the average number of hyperedges each node participates in. Consequently, a randomly chosen focal player engages in a three-player interaction with probability  $\delta = \frac{n_2}{Z\langle k \rangle}$ , and participates in a pairwise interaction with probability  $1 - \delta$ . Here, the total number of interactions satisfies  $Z\langle k \rangle = n_1 + n_2$ , with  $n_1 = \sum_i \sum_{g|q_g=2} b_{ig}$  representing the sum of elements of the incidence matrix restricted to hyperedges of size two, and  $n_2 = \sum_i \sum_{g|q_g=3} b_{ig}$  is hyperedges of size three [4].

In order to extend the traditional social dilemma game framework, we incorporate peer punishment as an additional strategic dimension. Thus, players may select among three strategies: cooperation (C), defection (D), and peer punishment (P). A player adopting the punishment strategy incurs a personal cost  $\alpha > 0$  each time they punish a defector. In contract, the punished defective player is charged with a fine  $\beta > 0$ .

At each time step, a randomly selected focal player participates either in a 3-person (namely 3-game) or a 2-person (2-game) interaction, according to the probabilities defined above. For the pairwise interaction scenario, the payoff matrix is explicitly given by:

$$\begin{array}{c|ccc} & C & D & P \\ \hline C & 1 & S & 1 \\ D & T & 0 & T - \beta \\ P & 1 & S - \alpha & 1 \end{array} \quad (5)$$

In this matrix, the parameters  $S$  and  $T$  represent the classic payoff structures for social dilemmas. Specifically, the Snowdrift game corresponds to payoff rankings  $T > 1 > S > 0$ , the Stag-Hunt game to  $1 > T > 0 > S$ , and the Prisoner's Dilemma to  $T > 1 > 0 > S$  [1].

For three-person interactions, the payoff structure expands due to multiple co-players, denoted

102 as

$$\begin{array}{c|cccccc}
 & CC & CD & CP & DD & DP & PP \\
 \hline
 C & 1 & G & 1 & S & G & 1 \\
 D & T & W & T - \beta & 0 & W - \beta & T - 2\beta \\
 P & 1 & G - \alpha & 1 & S - 2\alpha & G - \alpha & 1
 \end{array} \quad (6)$$

103 We consider a finite population of size  $Z$ , partitioned into three discrete strategic types: cooper-  
 104 ators ( $C$ ,  $X_C = i$ ), defectors ( $D$ ,  $X_D = j$ ) and peer punishers ( $P$ ,  $X_P = Z - i - j$ ). The relative  
 105 frequencies of these strategies are defined as

$$x_C = \frac{i}{Z}, \quad x_D = \frac{j}{Z}, \quad \text{and} \quad x_P = \frac{Z - i - j}{Z} = 1 - x_C - x_P.$$

106 The state of the system is represented by the vector  $\mathbf{X} = (i, j, Z - i - j)$  where  $i, j \in \mathbb{N}$ ,  
 107 with the transition  $\mathbf{X} \rightarrow \mathbf{X}' = (i + \delta_1, j + \delta_2, Z - i - j + \delta_3)$  following a death-birth process:  
 108 components exchange unit mass via vectors

$$(\delta_1, \delta_2, \delta_3) \in \{(\pm 1, \mp 1, 0), (\pm 1, 0, \mp 1), (0, \pm 1, \mp 1)\},$$

109 yielding six transitions per interior state. Then the cumulative payoffs for cooperators ( $\pi_C$ ),  
 110 defectors ( $\pi_D$ ) and punishers ( $\pi_P$ ), respectively, are given respectively by

$$\pi_C = \langle k \rangle \left\{ (1 - \delta) (x_C + x_D S + x_P) + \delta [(x_C + x_P)^2 + 2(x_C + x_P)x_D G + x_D^2 S] \right\}, \quad (7a)$$

$$\begin{aligned} \pi_D = \delta \langle k \rangle & \left[ (x_C + x_P)^2 T + 2(x_C + x_P)x_D W - 2x_P \beta \right] \\ & + (1 - \delta) \langle k \rangle [x_C T + x_P (T - \beta)], \end{aligned} \quad (7b)$$

$$\begin{aligned} \pi_P = \delta \langle k \rangle & \left[ (x_C + x_P)^2 + 2(x_C + x_P)x_D G + x_D^2 S - 2x_D \alpha \right] \\ & + (1 - \delta) \langle k \rangle [x_C + x_D (S - \alpha) + x_P]. \end{aligned} \quad (7c)$$

111 Thus, as described in subsection 1.1, we have

$$\begin{aligned} T_{13}^+(\mathbf{X}) = T_{P \rightarrow C}(\mathbf{X}) &= (1 - \mu) \frac{1}{1 + \exp[-\omega(\pi_C - \pi_P)]} x_C x_P + \mu \frac{x_P}{N - 1}, \\ T_{12}^+(\mathbf{X}) = T_{D \rightarrow C}(\mathbf{X}) &= (1 - \mu) \frac{1}{1 + \exp[-\omega(\pi_C - \pi_D)]} x_C x_D + \mu \frac{x_D}{N - 1}, \\ T_{23}^+(\mathbf{X}) = T_{P \rightarrow D}(\mathbf{X}) &= (1 - \mu) \frac{1}{1 + \exp[-\omega(\pi_D - \pi_P)]} x_D x_P + \mu \frac{x_P}{N - 1}. \end{aligned}$$

112 In a similar manner, expressions for  $T_{12}^-$ ,  $T_{13}^-$  and  $T_{23}^-$  can be obtained. The drift vector  $A$  and

diffusion matrix  $B$  in Eq. (2) are specifically defined as

$$A = \begin{pmatrix} (1 - \mu) [x_C x_P \tanh \frac{\omega}{2} (\pi_C - \pi_P) + x_C x_D \tanh \frac{\omega}{2} (\pi_C - \pi_D)] + \frac{\mu}{2} (1 - 3x_C) \\ (1 - \mu) [x_D x_P \tanh \frac{\omega}{2} (\pi_D - \pi_P) - x_C x_D \tanh \frac{\omega}{2} (\pi_C - \pi_D)] + \frac{\mu}{2} (1 - 3x_D) \\ (1 - \mu) [-x_C x_P \tanh \frac{\omega}{2} (\pi_C - \pi_P) - x_D x_P \tanh \frac{\omega}{2} (\pi_D - \pi_P)] + \frac{\mu}{2} (1 - 3x_P) \end{pmatrix},$$

and

$$B = \frac{(1 - \mu)}{Z} \begin{pmatrix} x_C(1 - x_C) & -x_C x_D & -x_C x_P \\ -x_C x_D & x_D(1 - x_D) & -x_D x_P \\ -x_C x_P & -x_D x_P & x_P(1 - x_P) \end{pmatrix} + \frac{\mu}{2Z} \begin{pmatrix} 1 + x_C & x_C + x_D & x_C + x_P \\ x_C + x_D & 1 + x_D & x_D + x_P \\ x_C + x_P & x_D + x_P & 1 + x_P \end{pmatrix}.$$

Taking the limit  $Z \rightarrow \infty$ , the diffusion term vanishes as  $\mathcal{O}(Z^{-1})$ , giving deterministic dynamics

$$\dot{x}_C = (1 - \mu) \left[ x_C x_P \tanh \frac{\omega}{2} (\pi_C - \pi_P) + x_C x_D \tanh \frac{\omega}{2} (\pi_C - \pi_D) \right] + \frac{\mu}{2} (1 - 3x_C), \quad (8a)$$

$$\dot{x}_D = (1 - \mu) \left[ x_D x_P \tanh \frac{\omega}{2} (\pi_D - \pi_P) - x_C x_D \tanh \frac{\omega}{2} (\pi_C - \pi_D) \right] + \frac{\mu}{2} (1 - 3x_D), \quad (8b)$$

$$\dot{x}_P = (1 - \mu) \left[ -x_C x_P \tanh \frac{\omega}{2} (\pi_C - \pi_P) - x_D x_P \tanh \frac{\omega}{2} (\pi_D - \pi_P) \right] + \frac{\mu}{2} (1 - 3x_P). \quad (8c)$$

### 1.3 Stationary Distribution Analysis

We still consider  $Z$  players who simultaneously engage in  $M$  games, with each player selecting a strategy from a set comprising  $N$  distinct strategies. The stationary distribution  $\bar{P}$  can be derived by setting the left-hand side of Eq. (1) to zero, thus the equation reduces to an eigenvector problem. Specifically, this involves solving the eigenvalue equation  $\mathcal{T}^\top \bar{P} = \bar{P}$ , where  $\mathcal{T}$  is the stochastic matrix that encodes the permissible state transitions. The state space  $\mathcal{S}$  consists of configurations  $\mathbf{X} = (X_1, X_2, \dots, X_N)$ ,  $\sum_{i=1}^N X_i = Z$ . Consequently, the cardinality of this state space is  $|\mathcal{S}| = \binom{Z+N-1}{N-1}$ .

Each off-diagonal element  $\mathcal{T}_{\mathbf{X} \rightarrow \mathbf{X}'}$  corresponds to transitions between adjacent states  $\mathbf{X}' = \mathbf{X} + \boldsymbol{\delta}$ , where the vector  $\boldsymbol{\delta} = (\delta_1, \dots, \delta_N)$  contains exactly two nonzero entries, specifically  $\delta_i = +1$  and  $\delta_j = -1$ , representing a shift of one individual from strategy  $S_j$  to strategy  $S_i$ . The corresponding transition probability from state  $\mathbf{X}$  to  $\mathbf{X}'$  is determined by the given rule

$$\mathcal{T}_{\mathbf{X} \rightarrow \mathbf{X}'} = T_{ij}^+(\mathbf{X}) = (1 - \mu) \frac{1}{1 + \exp[-\omega(\pi_{S_i} - \pi_{S_j})]} \frac{X_i}{Z} \frac{X_j}{Z} + \mu \frac{X_j}{(N-1)Z}.$$

It is evident that diagonal elements of the matrix  $\mathcal{T}$ , denoted by  $\mathcal{T}_{\mathbf{X} \rightarrow \mathbf{X}}$ , satisfy the condition  $\mathcal{T}_{\mathbf{X} \rightarrow \mathbf{X}} = 1 - \sum_{\mathbf{X}' \neq \mathbf{X}} \mathcal{T}_{\mathbf{X} \rightarrow \mathbf{X}'}$ . For example, in the case of  $Z = 2$  and  $N = 3$ , the system exhibits six distinct states, each represented by an ordered triplet  $(i, j, k)$  satisfying  $i + j + k = 2$ .



Here, the non-negative integers  $i$ ,  $j$ , and  $k$  correspond to the number of individuals adopting cooperation (C), defection (D), and punishment (P) strategies, respectively. The corresponding state transition matrix is given by

|           | (0, 0, 2)                    | (0, 1, 1)       | (0, 2, 0)                    | (1, 1, 0)       | (1, 0, 1)       | (2, 0, 0)                    |
|-----------|------------------------------|-----------------|------------------------------|-----------------|-----------------|------------------------------|
| (0, 0, 2) | $1 - \mu$                    | $\frac{\mu}{2}$ | 0                            | 0               | $\frac{\mu}{2}$ | 0                            |
| (0, 1, 1) | $\mathcal{F}(\pi_D - \pi_P)$ | 0               | $\mathcal{F}(\pi_P - \pi_D)$ | $\frac{\mu}{4}$ | $\frac{\mu}{4}$ | 0                            |
| (0, 2, 0) | 0                            | $\frac{\mu}{2}$ | $1 - \mu$                    | $\frac{\mu}{2}$ | 0               | 0                            |
| (1, 1, 0) | 0                            | $\frac{\mu}{4}$ | $\mathcal{F}(\pi_C - \pi_D)$ | 0               | $\frac{\mu}{4}$ | $\mathcal{F}(\pi_D - \pi_C)$ |
| (1, 0, 1) | $\mathcal{F}(\pi_C - \pi_P)$ | $\frac{\mu}{4}$ | 0                            | $\frac{\mu}{4}$ | 0               | $\mathcal{F}(\pi_P - \pi_C)$ |
| (2, 0, 0) | 0                            | 0               | 0                            | $\frac{\mu}{2}$ | $\frac{\mu}{2}$ | $1 - \mu$                    |

where  $\mathcal{F}(x)$  is given by

$$\mathcal{F}(x) = (1 - \mu) \frac{1}{1 + \exp(\omega x)} + \frac{\mu}{4}.$$

The payoffs  $\pi_C$ ,  $\pi_D$ , and  $\pi_P$  for cooperation, defection, and punishment strategies, respectively, are analytically determined through Eq. (7) under the condition  $\delta = 0$ , where  $\delta$  represents the probability of interaction with three players.

## 2 Replicator dynamics in higher-order interactions with punishment mechanisms

### 2.1 Governing equation derivation

We consider evolutionary dynamics in an infinite population limit ( $Z \rightarrow \infty$ ). Under the condition of weak selection ( $\omega \ll 1$ ) and in the absence of mutation ( $\mu = 0$ ), the evolutionary process (8) can be accurately captured by the replicator equation. Given the payoffs  $\pi_C$ ,  $\pi_D$ , and  $\pi_P$  previously defined in equations (7), the temporal evolution of the frequency of each strategy in a well-mixed population is described by

$$\frac{dx_i}{dt} = x_i (\pi_i - \langle \pi \rangle), \quad i = C, D, P, \quad (9)$$

where  $\langle \pi \rangle = x_C \pi_C + x_D \pi_D + x_P \pi_P$  represents the average payoff of the entire population. By explicitly substituting the average payoff  $\langle \pi \rangle$  into Eq. (9), we obtain the detailed expressions

149 governing the temporal evolution of each frequency of the strategy as follows:

$$\frac{dx_C}{dt} = x_C (1 - x_C) (\pi_C - \pi_D) + x_C x_P (\pi_D - \pi_P), \quad (10a)$$

$$\frac{dx_D}{dt} = x_D (1 - x_D) (\pi_D - \pi_C) + x_D x_P (\pi_C - \pi_P), \quad (10b)$$

$$\frac{dx_P}{dt} = x_P (1 - x_P) (\pi_P - \pi_C) + x_D x_P (\pi_C - \pi_D). \quad (10c)$$

150 Let  $a := 2(G - W)$ ,  $b := T - S - 1$  and  $c := a + b$ . In the case of the Prisoner's Dilemma, it  
 151 is given that for this game  $S < 0$ ,  $a > 0$  and  $b + S = T - 1 > 0$ . Therefore, we conclude that  
 152  $c > 0$ . Substituting Eq. (7) into Eq. (10), we obtain the following expressions:

$$\begin{aligned} \frac{dx_C}{dt} = \langle k \rangle \{ & -\delta x_C x_D^3 c + \delta x_C x_D [x_D c + x_P (\alpha + \beta)] + x_C x_D^2 (b + 2S - \alpha - \beta) \\ & + x_C x_D (-b - S + \alpha + \beta) - x_C^2 x_D (\alpha + \beta) \}, \end{aligned} \quad (11a)$$

$$\begin{aligned} \frac{dx_D}{dt} = \langle k \rangle \{ & \delta x_D^3 (1 - x_D) c + \delta x_D (1 - x_D) [-x_D (c - \alpha) - x_P \beta] - \delta x_C x_D^2 \alpha - x_D^2 x_C \alpha \\ & + x_D^2 (1 - x_D) (-b - 2S + \alpha + \beta) + x_C x_D (1 - x_D) \beta + x_D (1 - x_D) (b + S - \beta) \}, \end{aligned} \quad (11b)$$

$$\begin{aligned} \frac{dx_P}{dt} = \langle k \rangle \{ & -\delta x_D^3 x_P c + \delta x_D x_P [x_D c + x_P (\alpha + \beta) - \alpha] + x_P x_D^2 (b + 2S) \\ & + x_D x_P^2 (\alpha + \beta) + x_D x_P (-b - S - \alpha) \}. \end{aligned} \quad (11c)$$

## 153 2.2 Stability criteria and phase transitions

154 We denote the state of the system  $\mathbf{x} = (x_C, x_D, x_P)$ . Solving  $\frac{dx_i}{dt} = 0$ ,  $i = C, D, P$ , we obtain  
 155 equilibrium points which can be divided into three categories:

- 156 (i)  $x_D = 0$ ,  $x_C + x_P = 1$ , i.e., a point on the  $CP$ -edge,  $x^{(CP)} = (x_C^{(CP)}, 0, x_P^{(CP)})$ .
- 157 (ii)  $x_P = 0$ ,  $x_C + x_D = 1$ , i.e., a point on the  $CD$ -edge,  $x^{(CD)} = (x_C^{(CD)}, x_D^{(CD)}, 0)$ .
- 158 (iii)  $x_C = 0$ ,  $x_D + x_P = 1$ , i.e., a point on the  $DP$ -edge,  $x^{(DP)} = (0, x_D^{(DP)}, x_P^{(DP)})$ .

159 **Proposition 1.** Let  $\delta \in (0, 1]$  denote the probability of a three-player interaction and let  $\alpha > 0$   
 160 represent the cost incurred for peer punishment. Then, the dynamical system described by Eq.  
 161 (11) does not admit interior equilibria within the strategy simplex  $x_C + x_D + x_P = 1$ .

162 *Proof.* Assuming  $x_C, x_D, x_P \neq 0$ , for  $\frac{dp}{dt} = 0$ , the right-hand sides of Eq. (11)<sub>a</sub> and Eq. (11)<sub>c</sub>

163 can be reduced to

$$-\delta x_D^2 c + \delta [x_D c + x_P (\alpha + \beta)] + x_D (b + 2S - \alpha - \beta) - b - S + \alpha + \beta - x_C (\alpha + \beta) = 0, \quad (12a)$$

$$-\delta x_D^2 c + \delta [x_D c + x_P (\alpha + \beta) - \alpha] + x_D (b + 2S) + x_P (\alpha + \beta) - b - S - \alpha = 0. \quad (12b)$$

164 To admit a solution where all variables are strictly positive under the constraint  $x_C + x_D + x_P = 1$ ,  
165 the system must satisfy

$$(1 + \delta) \alpha = 0,$$

166 which is in contradiction with the definition of  $\alpha$ .  $\square$

167 **Case (i): The stability of  $x^{(CP)} = (x_C^{(CP)}, 0, x_P^{(CP)})$ .** When  $x_D = 0$ , it follows that  $\frac{dx_C}{dt} = \frac{dx_P}{dt}$ ,  
168 implying that strategies  $C$  and  $P$  are indistinguishable. Under this condition, it is appropriate to  
169 consider the combined proportion  $x_C + x_P$  as a single state variable. Thus, the system can be  
170 effectively analyzed by examining the dynamics of  $\frac{dx_D}{dt}$  and  $\frac{d(x_C + x_P)}{dt}$ . Since  $x_C + x_P = 1 - x_D$ ,  
171 substituting this identity directly yields

$$\begin{aligned} \frac{dx_D}{dt} = \langle k \rangle \{ & \delta x_D^3 (1 - x_D) c + \delta x_D (1 - x_D) [-x_D (c - \alpha) - x_P \beta] - \delta x_C x_D^2 \alpha - x_D^2 x_C \alpha \\ & + x_D^2 (1 - x_D) (-b - 2S + \alpha + \beta) + x_C x_D (1 - x_D) \beta + x_D (1 - x_D) (b + S - \beta) \}. \end{aligned}$$

172 The element of the single-order Jacobian matrix is

$$\begin{aligned} \frac{d\dot{x}_D}{dx_D} = \langle k \rangle \{ & 3\delta x_D^2 (1 - x_D) c - \delta x_D^3 c - 2\delta x_D (1 - x_D) (c - \alpha) + \delta x_D^2 (c - \alpha) + \delta x_D x_P \beta \\ & - \delta (1 - x_D) x_P \beta - 2(1 + \delta) x_C x_D \alpha + [2x_D (1 - x_D) - x_D^2] (-b - 2S + \alpha + \beta) \\ & + x_C (1 - x_D) \beta - x_C x_D \beta + (1 - x_D) (b + S - \beta) - x_D (b + S - \beta) \}. \end{aligned} \quad (13)$$

173 By substituting the expression for  $x^{(CP)}$  into Eq. (13), we have

$$\left. \frac{d\dot{x}_D}{dx_D} \right|_{x^{(CP)}} = \langle k \rangle \left[ -(1 + \delta) x_P^{(CP)} \beta + b + S \right]. \quad (14)$$

174 Therefore, the equilibrium state  $x^{(CP)}$  is stable if and only if  $x_C^{(CP)} < x_{C,*}^{(CP)}$  (or equivalently,  
175  $x_P^{(CP)} > x_{P,*}^{(CP)}$ ), where

$$x_{C,*}^{(CP)} = 1 - \frac{b + S}{(1 + \delta) \beta}, \quad (15)$$

176 and correspondingly,

$$x_{P,*}^{(CP)} = \frac{b + S}{(1 + \delta) \beta}.$$

177 Although every point on the  $CP$ -edge is an equilibrium, only those points satisfying  $x_C^{(CP)} <$

178  $x_{C,*}^{(CP)}$  exhibit stability. Through direct calculation, we derive the following explicit conditions:

- 179 • If inequality  $b + S < 0$  holds, it necessarily follows that  $x_{C,*}^{(CP)} > 1$ . Consequently, all  
180 points on the  $CP$ -edge are stable.
- 181 • If condition  $b + S > (1 + \delta)\beta$  is satisfied, it implies  $x_{C,*}^{(CP)} < 0$ . Thus, all points on the  
182  $CP$ -edge are unstable.
- 183 • If inequality  $0 < b + S < (1 + \delta)\beta$  holds, we have  $0 < x_{C,*}^{(CP)} < 1$ . In this case, the points  
184 on the  $CP$ -edge that satisfy  $x_C^{(CP)} < x_{C,*}^{(CP)}$  are stable.

185 **Case (ii): The stability of  $x^{(CD)} = (x_C^{(CD)}, x_D^{(CD)}, 0)$ .** We cancel  $x_P = 1 - x_C - x_D$  and study  
186 the dynamics depicted by  $\frac{dx_C}{dt}$  and  $\frac{dx_D}{dt}$ ,

$$\begin{aligned} \frac{dx_C}{dt} = \langle k \rangle \{ & -\delta x_C x_D^3 c + \delta x_C x_D [x_D c + (1 - x_C - x_D)(\alpha + \beta)] \\ & + x_C x_D^2 (b + 2S - \alpha - \beta) + x_C x_D (-b - S + \alpha + \beta) - x_C^2 x_D (\alpha + \beta) \}, \end{aligned} \quad (16a)$$

$$\begin{aligned} \frac{dx_D}{dt} = \langle k \rangle \{ & \delta x_D^3 (1 - x_D) c + \delta x_D (1 - x_D) [-x_D (c - \alpha) - (1 - x_C - x_D) \beta] \\ & - \delta x_C x_D^2 \alpha - x_D^2 x_C \alpha + x_D^2 (1 - x_D) (-b - 2S + \alpha + \beta) \\ & + x_C x_D (1 - x_D) \beta + x_D (1 - x_D) (b + S - \beta) \}. \end{aligned} \quad (16b)$$

187 For  $0 < x_D^{(CD)} < 1$ , it satisfies

$$-\delta c x_D^2 + x_D (\delta c + b + 2S) - b - S = 0. \quad (17)$$

188 Then the Jacobian matrix of the system (16) at  $x^{(CD)}$  is

$$J|_{x^{(CD)}} = \begin{pmatrix} m\langle k \rangle & n\langle k \rangle \\ -m\langle k \rangle - x_D^{(CD)}(1 + \delta)\langle k \rangle\alpha & -n\langle k \rangle - x_D^{(CD)}(1 + \delta)\langle k \rangle\alpha \end{pmatrix}, \quad (18)$$

189 where

$$\begin{aligned} m &= (1 + \delta)(\alpha + \beta) \left( x_D^{(CD)} - 1 \right) x_D^{(CD)}, \\ n &= \left( x_D^{(CD)} \right)^2 [b + 2S + (1 + \delta)(\alpha + \beta)] - x_D^{(CD)} [2(b + S) + (1 + \delta)(\alpha + \beta)] + b + S. \end{aligned}$$

190 The matrix has two eigenvalues, denoted as

$$\begin{aligned} \lambda_1 &= -(1 + \delta)\langle k \rangle x_D^{(CD)} \alpha, \\ \lambda_2 &= (m - n)\langle k \rangle = \left[ -\left( x_D^{(CD)} \right)^2 S - (b + S) \left( x_D^{(CD)} - 1 \right)^2 \right] \langle k \rangle. \end{aligned}$$

191 Besides,  $0 < x_C^{(CD)} < 1$  satisfies

$$-\delta c x_C^2 + x_C (\delta c - b - 2S) + S = 0. \quad (19)$$

192 Then we deduce that

$$\begin{aligned} \lambda_2 &= - \left( x_C^{(CD)} \right)^2 \langle k \rangle (b + 2S) + 2x_C^{(CD)} \langle k \rangle S - \langle k \rangle S \\ &= -x_C^{(CD)} \langle k \rangle \left[ -c\delta \left( x_C^{(CD)} \right)^2 + c\delta x_C^{(CD)} + S \right] + 2x_C^{(CD)} \langle k \rangle S - S \langle k \rangle \\ &= \left( 1 - x_C^{(CD)} \right) \langle k \rangle \left[ -c\delta \left( x_C^{(CD)} \right)^2 - S \right], \end{aligned}$$

193 which implies that  $\lambda_2$  is negative when  $\left( x_C^{(CD)} \right)^2 > -\frac{S}{c\delta}$ . Then we will determine the value of  
194  $x_C^{(CD)}$ . By solving equation (19), we have the non-trivial stationary solutions:

$$x_{C,\pm}^* = \frac{c\delta - b - 2S \pm \sqrt{(c\delta - b)^2 + 4S(b + S)}}{2c\delta}. \quad (20)$$

195 It follows that when  $\Delta = (c\delta - b)^2 + 4S(b + S) \geq 0$ , then  $x_{C,\pm}^*$  is real valued for every  
196  $b, c, \delta, S$ . Since  $c > 0$ ,  $\Delta \geq 0$  requires the following conditions:

$$\delta \geq \delta_+ := \frac{b + \sqrt{-4S(b + S)}}{c}, \quad (21a)$$

$$\delta \leq \delta_- := \frac{b - \sqrt{-4S(b + S)}}{c}. \quad (21b)$$

197 It can also be verified that if  $c\delta - b - 2S < 0$ , then  $x_{C,\pm}^* < 0$ . Conversely, if  $c\delta - b - 2S > 0$ ,  
198 or equivalently, if

$$\delta > \delta_* := \frac{b + 2S}{c}, \quad (22)$$

199 then  $x_{C,\pm}^* > 0$ . Since  $2S < \sqrt{-4S(b + S)}$ , it follows directly that  $\delta_- < \delta_* < \delta_+$ . Therefore,  
200 for  $\delta \geq \delta_+$ , there exist positive real-valued stationary solutions  $0 < x_{C,\pm}^* < 1$ , while for  
201  $\delta \leq \delta_- < \delta_*$ , the solutions are real but negative. We also observe that for the appearance of  
202 the non-trivial stationary solution  $x_{C,+}^*$  at  $\delta = \delta_+$  is always abrupt. Meanwhile, we have the  
203 following claim.

204 **Proposition 2.** Suppose  $0 < x_{C,\pm}^* < 1$  and  $x_{C,+}^* \neq x_{C,-}^*$ . Then, the stationary solution  
205  $x^{(CD)} = (x_{C,+}^*, 1 - x_{C,+}^*, 0)$  is stable, while the stationary solution  $x^{(CD)} = (x_{C,-}^*, 1 - x_{C,-}^*, 0)$   
206 is unstable.

207 *Proof.* Note that  $\lambda_1$  is always negative. Moreover, we recall that  $\lambda_2$  is negative in the case of  
208  $\left( x_C^{(CD)} \right)^2 > -\frac{S}{c\delta}$ . Let  $c\delta - b - 2S = M > 0$ . Then, we have  $M^2 + 4c\delta S = \Delta > 0$ . Next, we

investigate the condition  $(x_{C,+}^*)^2 > -\frac{S}{c\delta}$ . This is equivalent to

$$\begin{aligned}(x_{C,+}^*)^2 > -\frac{S}{c\delta} &\iff (M + \sqrt{\Delta})^2 > -4c\delta S \\ &\iff M^2 + 4c\delta S + M\sqrt{\Delta} > 0 \\ &\iff \Delta + M\sqrt{\Delta} > 0.\end{aligned}$$

The last inequality always holds, since  $\Delta > 0$  and  $M\sqrt{\Delta} > 0$ . Thus, we conclude that the stationary solution  $x^{(CD)} = (x_{C,+}^*, 1 - x_{C,+}^*, 0)$  is stable. Similarly, we have

$$\begin{aligned}(x_{C,-}^*)^2 > -\frac{S}{c\delta} &\iff (M - \sqrt{\Delta})^2 > -4c\delta S \\ &\iff M^2 + 4c\delta S - M\sqrt{\Delta} > 0 \\ &\iff \sqrt{\Delta}(\sqrt{\Delta} - M) > 0.\end{aligned}$$

This leads to a contradiction, as  $S < 0$  and  $\sqrt{\Delta} < M$ . Therefore, the stationary solution  $x^{(CD)} = (x_{C,-}^*, 1 - x_{C,-}^*, 0)$  is unstable.  $\square$

For  $x_D = 0$ , it has  $x^{(CD)} = (1, 0, 0)$ . Then the Jacobian matrix of the system (16) at  $x^{(CD)}$  is

$$J|_{x^{(CD)}} = \begin{pmatrix} 0 & (-b - S)\langle k \rangle \\ 0 & (b + S)\langle k \rangle \end{pmatrix}, \quad (23)$$

with eigenvalues  $\lambda_1 = 0$  and  $\lambda_2 = (b + S)\langle k \rangle$ . Since  $b + S > 0$ ,  $x^{(CD)}$  is unstable.

**Case (iii): The stability of  $x^{(DP)} = (0, x_D^{(DP)}, x_P^{(DP)})$ .** We cancel  $x_C = 1 - x_D - x_P$  and study the dynamics depicted by  $\frac{dx_D}{dt}$  and  $\frac{dx_P}{dt}$ ,

$$\begin{aligned}\frac{dx_D}{dt} &= \langle k \rangle \{ \delta x_D^3 (1 - x_D) c + \delta x_D (1 - x_D) [-x_D (c - \alpha) - x_P \beta] \\ &\quad - x_D^2 (1 - x_D) (b + 2S - \alpha - \beta) - (1 + \delta) (1 - x_D - x_P) x_D^2 \alpha \\ &\quad + x_D (1 - x_D) [(1 - x_D - x_P) \beta + (b + S - \beta)] \},\end{aligned} \quad (24a)$$

$$\begin{aligned}\frac{dx_P}{dt} &= \langle k \rangle \{ -\delta x_D^3 x_P c + \delta x_D x_P [x_D c + x_P (\alpha + \beta) - \alpha] + x_P x_D^2 (b + 2S) \\ &\quad + x_D x_P^2 (\alpha + \beta) + x_D x_P (-b - S - \alpha) \}.\end{aligned} \quad (24b)$$

For  $0 < x_D^{(CD)} < 1$ , it satisfies

$$\delta c x_D^2 + x_D [\delta (\alpha + \beta - c) + (\alpha + \beta - b - 2S)] + b + S - (1 + \delta) \beta = 0. \quad (25)$$

219 Then the Jacobian matrix of the system (24) at  $x^{(DP)}$  is

$$J|_{x^{(DP)}} = \begin{pmatrix} m\langle k \rangle & n\langle k \rangle \\ -m\langle k \rangle + x_D^{(DP)}(1+\delta)\langle k \rangle\alpha & -n\langle k \rangle + x_D^{(DP)}(1+\delta)\langle k \rangle\alpha \end{pmatrix}, \quad (26)$$

220 where

$$\begin{aligned} m &= \left(x_D^{(DP)}\right)^2 [2(1+\delta)(\alpha+\beta) - (b+2S)] + x_D^{(DP)} [2(b+S) - 3(1+\delta)\beta] \\ &\quad - b - S + (1+\delta)\beta, \\ n &= \left(x_D^{(DP)}\right)^2 (1+\delta)(\alpha+\beta) - x_D^{(DP)}(1+\delta)\beta. \end{aligned}$$

221 The matrix has two eigenvalues, denoted as

$$\begin{aligned} \lambda_1 &= x_D^{(DP)}(1+\delta)\langle k \rangle\alpha, \\ \lambda_2 &= \left(x_D^{(DP)}\right)^2 \langle k \rangle [(1+\delta)(\alpha+\beta) - (b+2S)] + 2x_D^{(DP)}\langle k \rangle [(b+S) - (1+\delta)\beta] \\ &\quad - b\langle k \rangle - S\langle k \rangle + (1+\delta)\langle k \rangle\beta. \end{aligned}$$

222 Since  $\lambda_1$  is always positive,  $x^{(DP)}$  is unstable. Note that, when considering only the points on  
223 the  $DP$ -edge, we return to the case where only the two strategies  $D$  and  $P$  are present. In this  
224 case,

$$\begin{aligned} \frac{dx_P}{dt} &= x_P(1-x_P)(\pi'_P - \pi'_D) \\ &= x_P(1-x_P)\langle k \rangle \left\{ -c\delta x_P^2 + x_P[c\delta - b - 2S + (1+\delta)(\alpha+\beta)] + S - (1+\delta)\alpha \right\}, \end{aligned} \quad (27)$$

225 where

$$\begin{aligned} \pi'_P &= (1-\delta)\langle k \rangle [x_D(S-\alpha) + x_P] + \delta\langle k \rangle [x_P^2 + x_D^2(S-2\alpha) + 2x_Dx_P(G-\alpha)], \\ \pi'_D &= (1-\delta)\langle k \rangle x_P(T-\beta) + \delta\langle k \rangle [x_P^2(T-2\beta) + 2x_Dx_P(W-\beta)]. \end{aligned}$$

226 In the following, we need to consider the solution of equation  $\pi'_P - \pi'_D = 0$ . In other words, we  
227 consider the quadratic equation

$$-c\delta x_P^2 + x_P[c\delta - b - 2S + (1+\delta)(\alpha+\beta)] + S - (1+\delta)\alpha = 0 \quad (28)$$

228 and obtain the following result.

229 **Proposition 3.** *If  $(1+\delta)\beta > b+S$ , then the equation (28) admits two real solutions*

$$x_{P,\pm}^* = \frac{c\delta - b - 2S + (1+\delta)(\alpha+\beta) \pm \sqrt{\Delta}}{2c\delta},$$

230 where  $\Delta = [c\delta - b - 2S + (1 + \delta)(\alpha + \beta)]^2 + 4c\delta[S - (1 + \delta)\alpha]$ . Moreover, these solutions  
 231 satisfy the inequalities  $0 < x_{P,-}^* < 1$  and  $x_{P,+}^* > 1$ . In addition,  $x_{P,-}^*$  is unstable.

232 *Proof.* Since  $(1 + \delta)\beta > b + S$ , it follows that

$$\begin{aligned}\Delta &= [c\delta - b - 2S + (1 + \delta)(\alpha + \beta)]^2 + 4c\delta[S - (1 + \delta)\alpha] \\ &> [c\delta - S + (1 + \delta)\alpha]^2 + 4c\delta[S - (1 + \delta)\alpha] \\ &= [c\delta + S - (1 + \delta)\alpha]^2 \\ &> 0.\end{aligned}$$

233 Therefore, the equation has real solutions. Moreover, it is straightforward to verify that both  
 234 solutions,  $x_{P,\pm}^*$ , are positive.

235 Next, we find that  $x_{P,-}^* < 1$  is equivalent to

$$-c\delta - b - 2S + (1 + \delta)(\alpha + \beta) < \sqrt{\Delta}. \quad (29)$$

236 Now we consider two cases:

237 (i) If  $c\delta + b + 2S \geq (1 + \delta)(\alpha + \beta)$ , the inequality (29) always holds.

238 (ii) If  $c\delta + b + 2S < (1 + \delta)(\alpha + \beta)$ , the inequality (29) is equivalent to

$$[-c\delta - b - 2S + (1 + \delta)(\alpha + \beta)]^2 < \Delta \iff 4c\delta[b + S - (1 + \delta)\beta] < 0$$

239 And the last line always holds under the condition  $(1 + \delta)\beta > b + S$ .

240 Furthermore, we find that  $x_{P,+}^* > 1$  is equivalent to

$$\sqrt{\Delta} > c\delta + b + 2S - (1 + \delta)(\alpha + \beta). \quad (30)$$

241 Similar to  $x_{P,-}^*$ , we consider two cases as follows:

242 (i) If  $c\delta + b + 2S \leq (1 + \delta)(\alpha + \beta)$ , the inequality (30) always holds.

243 (ii) If  $c\delta + b + 2S > (1 + \delta)(\alpha + \beta)$ , the inequality (30) is also equivalent to

$$4c\delta[b + S - (1 + \delta)\beta] < 0,$$

244 which, once again, holds in the case of  $(1 + \delta)\beta > b + S$ .

245 In conclusion, we have  $0 < x_{P,-}^* < 1$  and  $x_{P,+}^* > 1$ . We then prove that  $x_{P,-}^*$  is unstable. Let

$$f(x_P) = x_P(1 - x_P) \{-c\delta x_P^2 + x_P[c\delta - b - 2S + (1 + \delta)(\alpha + \beta)] + S - (1 + \delta)\alpha\}.$$



246 Then, we compute the derivative of  $f(x_P)$  at  $x_{P,-}^*$ :

$$f'(x_{P,-}^*) = x_{P,-}^* (1 - x_{P,-}^*) [-2c\delta x_{P,-}^* + c\delta - b - 2S + (1 + \delta)(\alpha + \beta)] > 0,$$

247 where  $-2c\delta x_{P,-}^* + c\delta - b - 2S + (1 + \delta)(\alpha + \beta) = \sqrt{\Delta} > 0$ . Hence,  $x_{P,-}^*$  is unstable.  $\square$

248 We now analyze the stable stationary solutions on the  $DP$ -edge under the condition  $b + S \geq$   
 249  $(1 + \delta)\beta$ . Specifically, we examine the real-valued roots within the interval  $(0, 1)$  of equation  
 250 (28). Suppose that this equation has two distinct solutions  $x_1, x_2 \in (0, 1)$ . This implies that the  
 251 discriminant  $\Delta$  must satisfy

$$\Delta = [c\delta - b - 2S + (1 + \delta)(\alpha + \beta)]^2 + 4c\delta [S - (1 + \delta)\alpha] > 0.$$

252 Under this condition, the two distinct solutions are explicitly given by

$$x_{1,2} = \frac{c\delta - b - 2S + (1 + \delta)(\alpha + \beta) \pm \sqrt{\Delta}}{2c\delta}. \quad (31)$$

253 Based on direct calculations, we will identify three scenarios in the following.

254 **(A1)** When

$$\begin{cases} c\delta - b - 2S + (1 + \delta)(\alpha + \beta) > 0, \\ c\delta + b + 2S - (1 + \delta)(\alpha + \beta) > 0, \end{cases}$$

255 both solutions  $x_1, x_2$  lie within  $(0, 1)$ . Among them, the solution  $x_1$  is unstable, while the  
 256 solution  $x_2$  is stable.

257 **(A2)** When

$$\begin{cases} c\delta - b - 2S + (1 + \delta)(\alpha + \beta) > 0, \\ c\delta + b + 2S - (1 + \delta)(\alpha + \beta) < 0, \end{cases}$$

258 both solutions  $x_1, x_2$  are greater than 1.

259 **(A3)** When  $c\delta - b - 2S + (1 + \delta)(\alpha + \beta) < 0$ , both solutions  $x_1$  and  $x_2$  are negative.

260 We proceed by analyzing case **(A1)**. Combining condition  $b + S \geq (1 + \delta)\beta$  with the case **(A1)**,  
 261 we define three critical parameters as

$$\delta_1 = \frac{b + S}{\beta} - 1, \delta_2 = \frac{b + 2S - \alpha - \beta}{c + \alpha + \beta} \text{ and } \delta_3 = \frac{\alpha + \beta - b - 2S}{c - \alpha - \beta}.$$

262 If condition  $c - \alpha - \beta > 0$  holds, the signs of  $\delta_2$  and  $\delta_3$  are strictly opposite. Specifically, if  
 263  $\delta_2 > 0$ , then it necessarily follows that  $\delta_3 < 0$ . In contrast, under the condition  $c - \alpha - \beta < 0$ ,

combined with the assumptions outlined in **(A1)**, we must simultaneously have  $\delta < \delta_3$  and  $\delta > \delta_2$ . This scenario warrants further consideration in two distinct cases:

- If  $\alpha + \beta > b + 2S$ , it implies that both  $\delta_3 < 0$  and  $\delta_2 < 0$ , thereby making it impossible to satisfy the simultaneous inequalities, resulting in a contradiction.
- If  $\alpha + \beta < b + 2S$ , noting that  $c = a + b < \alpha + \beta$ , together with the imposed constraints  $S < 0$ ,  $a > 0$ ,  $b > 0$ , it is a contradiction to  $\alpha + \beta < b + 2S$ .

Hence, under the condition  $c - \alpha - \beta < 0$ , both cases inevitably lead to logical contradictions, thus demonstrating that the initial assumptions are invalid in this scenario. Next, we analyze the condition  $\Delta > 0$ . Let  $f(\delta)$  denote

$$f(\delta) = \Delta = \delta^2 [(c - \alpha - \beta)^2 + 4c\beta] + 2\delta \{c(\beta - \alpha - b) + (\alpha + \beta)[(\alpha + \beta) - (b + 2S)]\} + (b + 2S - \alpha - \beta)^2. \quad (32)$$

Notice that  $f(\delta)$  is a quadratic function in  $\delta$  with a positive leading coefficient and satisfies  $f(0) > 0$ . Therefore, if the quadratic does not admit real roots, then  $f(\delta) > 0$  holds for all  $\delta \in (0, 1)$ . If, on the other hand,  $f(\delta) = 0$  has two distinct real solutions (that is, its discriminant  $\Delta' > 0$ ), denoted by  $x_{\delta,-}$  and  $x_{\delta,+}$  with  $x_{\delta,-} < x_{\delta,+}$ . If both roots lie within the interval  $(0, 1)$ , then by the upward-opening nature of  $f(\delta)$ , it follows that  $f(\delta) > 0$  precisely for

$$0 < \delta < x_{\delta,-} \quad \text{or} \quad x_{\delta,+} < \delta < 1.$$

Define

$$\delta_4 = \begin{cases} x_{\delta,-} & \text{if } x_{\delta,-} \text{ exists} \\ 1 & \text{otherwise} \end{cases} \quad \text{and} \quad \delta_5 = \begin{cases} x_{\delta,+} & \text{if } x_{\delta,+} \text{ exists} \\ 0 & \text{otherwise} \end{cases},$$

and it is obvious that  $\delta_4 < \delta_5$ . Specifically, if the corresponding root lies in the interval  $(0, 1)$ ,  $\delta$  takes that value; otherwise (or if no such root exists), we set  $\delta_4 = 1$  and  $\delta_5 = 0$ . Based on the preceding discussion, we now state the following proposition.

**Proposition 4.** *Let  $\alpha$ ,  $\beta$ ,  $c$ ,  $b$  and  $S$  be parameters that satisfy  $c - \alpha - \beta > 0$ . If*

$$\max \{\delta_2, \delta_3\} < \delta < \min \{\delta_1, \delta_4, 1\} \quad \text{or} \quad \max \{\delta_2, \delta_3, \delta_5\} < \delta < \min \{\delta_1, 1\},$$

*then the DP-edge admits two fixed points,  $x_1$  and  $x_2$ , with  $x_1, x_2 \in (0, 1)$  as defined in Eq. (31). Moreover,  $x_1$  is unstable, while  $x_2$  is stable.*

Let  $\delta_6 = \delta_+ = \frac{b + \sqrt{-4S(b+S)}}{c}$  and  $\delta_7 = \max \{\delta_2, \delta_3\}$ . We analyze the order of stable equilibrium points by comparing the magnitudes of critical thresholds  $\delta_1$ ,  $\delta_4$ ,  $\delta_5$ ,  $\delta_6$  and  $\delta_7$ . Given the multi-parametric nature of the system, accurate determination of these critical thresholds inherently

depends on parameter selection. Based on the preceding analysis, we choose the appropriate parameter values to provide a clear illustration.

With the parameters  $\alpha$ ,  $\beta$ ,  $b$ ,  $c$ , and  $S$  fixed appropriately, we explore the relationship between the sequential emergence of stable equilibrium points and the probability of third-order interactions  $\delta$ . The relationships can be broadly classified into several distinct categories when  $\delta_5 > \delta_1$ , as shown in Fig. 1. Here,  $\delta_1$  characterizes the emergence of a stable equilibrium on the CP-edge, while the relationship between  $\delta_4$  and  $\delta_7$  governs the formation of a stable equilibrium on the DP-edge. Similarly,  $\delta_6$  determines the stability condition for the equilibria along the CD-edge. The schematic representation is conceptual rather than quantitative; data points illustrate the relative ordering (non-strict inequality) of the parameters  $\delta_1$ ,  $\delta_4$ ,  $\delta_5$ ,  $\delta_6$ ,  $\delta_7$ , without implying specific numerical values.

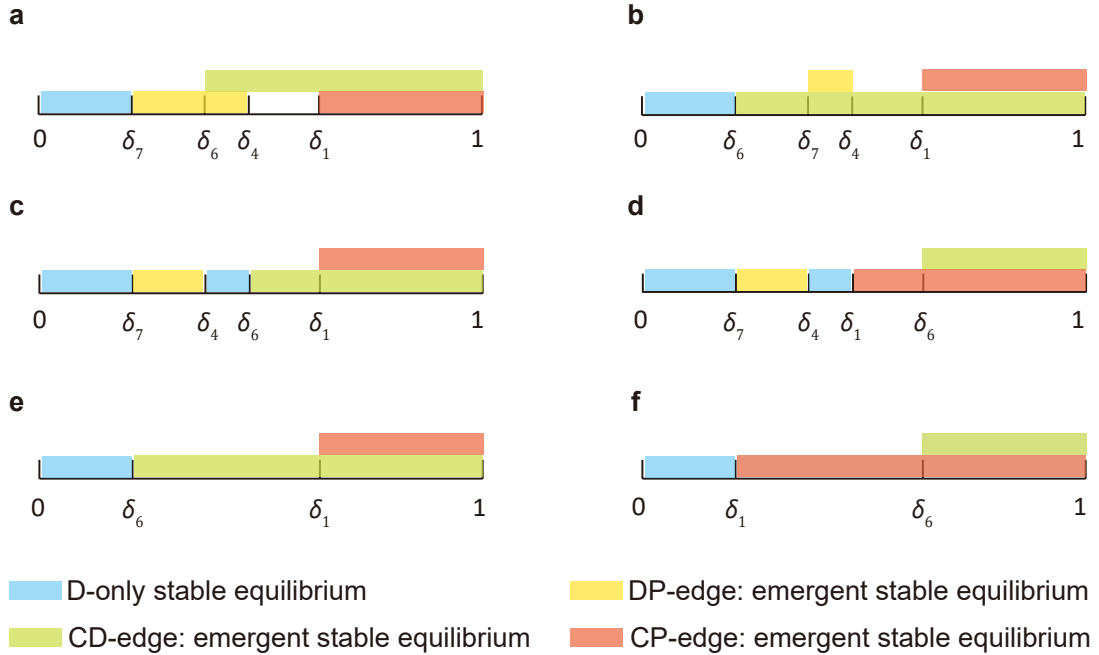

**Figure 1:** Hierarchical emergence of stable equilibria as governed by the third-order interaction probability  $\delta$  with all other parameters suitably fixed. Panels **a-d** show the bifurcation sequences and resulting equilibrium types when stable points arise at the *DP*-edge. In contrast, **e-f** illustrate scenarios in which no stable equilibria persist at the *DP*-edge.

298

For  $x_D = 0$ , it has  $x^{(DP)} = (0, 0, 1)$ . The Jacobian matrix of the system (24) at  $x^{(DP)}$  is

$$J|_{x^{(DP)}} = \begin{pmatrix} [b + S - (1 + \delta)\beta] \langle k \rangle & 0 \\ [(1 + \delta)\beta - (b + S)] \langle k \rangle & 0 \end{pmatrix}, \quad (33)$$

with eigenvalues  $\lambda_1 = 0$  and  $\lambda_2 = [b + S - (1 + \delta)\beta] \langle k \rangle$ . The stability condition for the equilibrium point  $x^{(DP)} = (0, 0, 1)$  is determined by the sign of the expression  $b + S - (1 + \delta)\beta$ .

For  $x_P = 0$ , it has  $x^{(DP)} = (0, 1, 0)$ . The Jacobian matrix of the system (24) at  $x^{(DP)}$  is

$$J|_{x^{(DP)}} = \begin{pmatrix} S\langle k \rangle & (1 + \delta)\langle k \rangle\alpha \\ 0 & -(1 + \delta)\langle k \rangle\alpha + S\langle k \rangle \end{pmatrix}, \quad (34)$$

with eigenvalues  $\lambda_1 = S\langle k \rangle$  and  $\lambda_2 = -(1 + \delta)\langle k \rangle\alpha + S\langle k \rangle$ . Since  $\alpha > 0$  and  $S < 0$ ,  $x^{(DP)}$  is stable.

### 3 Replicator Dynamics in Two-Population Games under Higher-Order Interactions and Punishment Mechanisms

In this section, we consider a theoretical model involving two distinct roles, each associated with two strategies, in a population where individuals participate concurrently in both pairwise and three-player interactions. Our primary objective is to determine how the proportion of these two roles affects the prevalence of cooperation in the population.

We denote the two roles by  $M_1$  and  $M_2$ , with  $\eta$  representing the proportion of individuals in role  $M_1$ , and  $1 - \eta$  the proportion in role  $M_2$ . The set of strategies for  $M_1$  is  $S_{M_1} = \{C, D_1\}$ , while the set of strategies for  $M_2$  is  $S_{M_2} = \{P, D_2\}$ . Let  $x_C \in [0, \eta]$  and  $x_{D_1} \in [0, \eta]$  denote the proportions of the population adopting strategies  $C$  and  $D_1$  respectively, constrained by  $x_C + x_{D_1} = \eta$ . Similarly, define  $x_P \in [0, 1 - \eta]$  and  $x_{D_2} \in [0, 1 - \eta]$  as the proportions for strategies  $P$  and  $D_2$ , satisfying  $x_P + x_{D_2} = 1 - \eta$ . Moreover, by direct computation,  $x_1 = \frac{x_C}{\eta}$  is the proportion of  $M_1$  individuals using strategy  $C$ , which implies that the proportion of  $M_1$  individuals using strategy  $D_1$  is  $1 - x_1$ . Similarly,  $x_2 = \frac{x_P}{1 - \eta}$  is the proportion of  $M_2$  individuals using strategy  $P$ , while  $1 - x_2$  is the proportion of  $M_2$  individuals using strategy  $D_2$ . For the pairwise interaction scenario, the payoff matrix is explicitly given by

$$\begin{array}{c|cccc} M_1 & P & D_2 & C & D_1 \\ \hline C & 1 & S & 1 & S \\ D_1 & T - \beta & 0 & T & 0 \end{array} \quad \text{and} \quad \begin{array}{c|cccc} M_2 & C & D_1 & P & D_2 \\ \hline P & 1 & S - \alpha & 1 & S - \alpha \\ D_2 & T & 0 & T - \beta & 0 \end{array}.$$

For three-person interactions, the payoff structure expands due to multiple co-players, denoted as

$$\begin{array}{c|cccccccccc} M_1 & CC & CD_1 & CD_2 & CP & D_1D_2 & D_1D_1 & D_2D_2 & D_1P & D_2P & PP \\ \hline C & 1 & G & G & 1 & S & S & S & G & G & 1 \\ D_1 & T & W & W & T - \beta & 0 & 0 & 0 & W - \beta & W - \beta & T - 2\beta \end{array},$$

324 and

| $M_2$ | $CC$ | $CD_1$       | $CD_2$       | $CP$        | $D_1D_2$      | $D_1D_1$      | $D_2D_2$      | $D_1P$       | $D_2P$       | $PP$         |
|-------|------|--------------|--------------|-------------|---------------|---------------|---------------|--------------|--------------|--------------|
| $P$   | 1    | $G - \alpha$ | $G - \alpha$ | 1           | $S - 2\alpha$ | $S - 2\alpha$ | $S - 2\alpha$ | $G - \alpha$ | $G - \alpha$ | 1            |
| $D_2$ | $T$  | $W$          | $W$          | $T - \beta$ | 0             | 0             | 0             | $W - \beta$  | $W - \beta$  | $T - 2\beta$ |

325 The expected payoffs for each strategy are given by

$$\pi_C = (1 - \delta) \langle k \rangle [(1 - x_C - x_P)S + x_C + x_P] + \delta \langle k \rangle [(1 - x_C - x_P)^2 S + 2(x_C + x_P)(1 - x_C - x_P)G + (x_C + x_P)^2], \quad (35a)$$

$$\pi_{D_1} = \pi_{D_2} = (1 - \delta) \langle k \rangle [(x_C + x_P)T - x_P\beta] + \delta \langle k \rangle [(x_C + x_P)^2 T - 2x_P\beta + 2(x_C + x_P)(1 - x_C - x_P)W], \quad (35b)$$

$$\pi_P = (1 - \delta) \langle k \rangle [(1 - x_C - x_P)(S - \alpha) + x_P + x_C] + \delta \langle k \rangle [(1 - x_C - x_P)^2 S + 2(x_C + x_P)(1 - x_C - x_P)G - 2(1 - x_C - x_P)\alpha + (x_C + x_P)^2]. \quad (35c)$$

326 The mean payoff of the population  $M_1$  is then calculated by  $\langle \pi_1 \rangle = x_1 \pi_C + (1 - x_1) \pi_{D_1}$ , while  
 327 the mean payoff of the population  $M_2$  is  $\langle \pi_2 \rangle = x_2 \pi_P + (1 - x_2) \pi_{D_2}$ . Then the evolution in  
 328 time of the proportion of  $x_1$  and  $x_2$  is given by the replicator equation

$$\begin{cases} \dot{x}_1 = x_1(\pi_C - \langle \pi_1 \rangle) \\ \dot{x}_2 = x_2(\pi_P - \langle \pi_2 \rangle) \end{cases}. \quad (36)$$

329 Substituting the expression for  $\langle \pi_1 \rangle$  and  $\langle \pi_2 \rangle$  into Eq. (10), we have

$$\begin{cases} \dot{x}_1 = x_1(1 - x_1)(\pi_C - \pi_{D_1}), \\ \dot{x}_2 = x_2(1 - x_2)(\pi_P - \pi_{D_2}), \end{cases} \quad (37)$$

330 where

$$\begin{aligned} \pi_C - \pi_{D_1} &= \delta \langle k \rangle (x_C + x_P)^2 (1 - T + 2W - 2G + S) + (x_C + x_P) \langle k \rangle (1 - S - T) + S \langle k \rangle \\ &\quad + x_P \langle k \rangle \beta + \delta \langle k \rangle [(x_C + x_P)(T - 1 + 2G - 2W - S) + x_P \beta] \end{aligned}$$

331 and

$$\pi_P - \pi_{D_2} = \pi_C - \pi_{D_1} - (1 + \delta) \langle k \rangle (1 - x_C - x_P) \alpha.$$

332 We also denote  $a = 2(G - W)$ ,  $b = T - 1 - S$  and  $c = a + b$ . We define the payoff difference  
 333 functions  $f(x_C, x_P) = \pi_C - \pi_{D_1}$  and  $g(x_C, x_P) = \pi_P - \pi_{D_2}$  as

$$f(x_C, x_P) = [(x_C + x_P)(c\delta - b - 2S) - c\delta(x_C + x_P)^2 + (1 + \delta)x_P\beta + S] \langle k \rangle$$

334 and

$$g(x_C, x_P) = f(x_C, x_P) - (1 + \delta)\langle k \rangle(1 - x_C - x_P)\alpha,$$

335 respectively. Assuming that  $\dot{x}_1 = 0$  and  $\dot{x}_2 = 0$ , the equilibrium points in Eq. (37) classified  
336 into three distinct categories:

337 (i) **Vertex equilibrium points.** Four vertex equilibrium points are given by  $V_1 = (0, 0)$ ,  $V_2 =$   
338  $(0, 1)$ ,  $V_3 = (1, 0)$ , and  $V_4 = (1, 1)$ .

339 (ii) **Interior equilibrium point.** There exists one interior equilibrium point  $V_5 = (x_1^*, x_2^*)$ ,  
340 where

$$x_1^* = \frac{(1 + \delta)\beta - (T - 1)}{(1 + \delta)\beta\eta} \text{ and } x_2^* = \frac{T - 1}{(1 - \eta)(1 + \delta)\beta}.$$

341 This equilibrium is meaningful if and only if the condition  $T - 1 = b + S < (1 + \delta)\beta$  is  
342 satisfied.

343 (iii) **Boundary equilibrium points.** There are four boundary equilibrium points defined as  
344 follows:

- 345 •  $V_6 = (1, x'_2)$ , with  $x'_2 \in (0, 1)$  satisfying  $g(\eta, (1 - \eta)x'_2) = 0$ ;
- 346 •  $V_7 = (0, x'_2)$ , with  $x'_2 \in (0, 1)$  satisfying  $g(0, (1 - \eta)x'_2) = 0$ ;
- 347 •  $V_8 = (x'_1, 0)$ , with  $x'_1 \in (0, 1)$  satisfying  $f(\eta x'_1, 0) = 0$ ;
- 348 •  $V_9 = (x'_1, 1)$ , with  $x'_1 \in (0, 1)$  satisfying  $f(\eta x'_1, 1 - \eta) = 0$ .

349 We turn to studying the stability of these equilibrium points. The Jacobian matrix of the system  
350 (37) is

$$J = \begin{pmatrix} (1 - 2x_1)f(\eta x_1, (1 - \eta)x_2) + x_1(1 - x_1)\frac{\partial f}{\partial x_1} & x_1(1 - x_1)\frac{\partial f}{\partial x_2} \\ x_2(1 - x_2)\frac{\partial g}{\partial x_1} & (1 - 2x_2)g(\eta x_1, (1 - \eta)x_2) + x_2(1 - x_2)\frac{\partial g}{\partial x_2} \end{pmatrix}. \quad (38)$$

351 **Case (i): The stability of vertex equilibrium points.** Substituting the value of  $V_1 = (0, 0)$  into  
352 Eq. (38), we have

$$J|_{V_1} = \begin{pmatrix} S\langle k \rangle & 0 \\ 0 & S\langle k \rangle - (1 + \delta)\langle k \rangle\alpha \end{pmatrix}.$$

353 We know that  $V_1$  is stable if and only if  $S < 0$ . Similarly, substituting  $V_2 = (0, 1)$ ,  $V_3 = (1, 0)$ ,  
354 and  $V_4 = (1, 1)$  into Eq. (38), we obtain

$$J|_{V_2} = \begin{pmatrix} f(0, 1 - \eta) & 0 \\ 0 & -g(0, 1 - \eta) \end{pmatrix}, \quad J|_{V_3} = \begin{pmatrix} -f(\eta, 0) & 0 \\ 0 & g(\eta, 0) \end{pmatrix},$$

355 and

$$J|_{V_4} = \begin{pmatrix} -f(\eta, 1-\eta) & 0 \\ 0 & -g(\eta, 1-\eta) \end{pmatrix}.$$

356 For the equilibrium point  $V_2$ :

- 357 • If  $f(0, 1-\eta) < 0$ , it follows that  $g(0, 1-\eta) = f(0, 1-\eta) - (1+\delta)\langle k \rangle \eta \alpha < 0$ , implying  
358 that  $V_2$  is a saddle point.
- 359 • If  $f(0, 1-\eta) > 0$ , then  $V_2$  is a saddle when  $g(0, 1-\eta) > 0$  and unstable when  $g(0, 1-\eta) < 0$ .  
360

361 For the equilibrium point  $V_3$ :

- 362 • If  $f(\eta, 0) < 0$ , then  $g(\eta, 0) = f(\eta, 0) - (1+\delta)\langle k \rangle (1-\eta) \alpha < 0$ , indicating that  $V_2$  is a  
363 saddle point.
- 364 • If  $f(\eta, 0) > 0$ , then  $V_2$  is a saddle when  $g(\eta, 0) > 0$  and stable when  $g(\eta, 0) < 0$ .

365 For the equilibrium point  $V_4$ :

- 366 • Since  $f(\eta, 1-\eta) = g(\eta, 1-\eta) = (1+\delta)\langle k \rangle (1-\eta) \beta - b - S$ ,  $V_4$  is stable when  
367  $f(\eta, 1-\eta) > 0$  and unstable when  $f(\eta, 1-\eta) < 0$ .

368 **Case (ii): The stability of the interior equilibrium point.** Substituting  $V_5 = (x_1^*, x_2^*)$  into Eq.  
369 (38), since  $\eta x_1^* + (1-\eta)x_2^* = 1$  and  $f(\eta x_1^*, (1-\eta)x_2^*) = g(\eta x_1^*, (1-\eta)x_2^*) = 0$ , we have

$$J|_{V_5} = \begin{pmatrix} -QM\langle k \rangle & -Q\langle k \rangle [M - (1+\delta)\beta] \\ -R\langle k \rangle [M - (1+\delta)\alpha] & -R\langle k \rangle [M - (1+\delta)(\alpha + \beta)] \end{pmatrix},$$

370 where  $M = c\delta + b + 2S$ ,  $Q = \eta x_1^*(1 - x_1^*)$  and  $R = (1-\eta)x_2^*(1 - x_2^*)$ . Then we obtain

$$\begin{aligned} \det(\lambda I - J|_{V_5}) &= \begin{vmatrix} \lambda + MQ\langle k \rangle & Q\langle k \rangle [M - (1+\delta)\beta] \\ R\langle k \rangle [M - (1+\delta)\alpha] & \lambda + R\langle k \rangle [M - (1+\delta)(\alpha + \beta)] \end{vmatrix} \\ &= \lambda^2 + [(Q+R)M - R(1+\delta)(\alpha + \beta)] \langle k \rangle \lambda - QR(1+\delta)^2 \langle k \rangle^2 \alpha \beta. \end{aligned}$$

371 Given that

$$\Delta = [(Q+R)M - R(1+\delta)(\alpha + \beta)]^2 \langle k \rangle^2 + 4QR(1+\delta)^2 \langle k \rangle^2 \alpha \beta > 0,$$

372 the characteristic equation  $\det(\lambda I - J|_{V_5}) = 0$  has two distinct real roots, denoted  $\lambda_1$  and  $\lambda_2$ .

373 Furthermore, since

$$\lambda_1 \lambda_2 = -QR(1+\delta)^2 \langle k \rangle^2 \alpha \beta < 0,$$

374 it follows that  $\lambda_1$  and  $\lambda_2$  have opposite signs. This indicates that  $V_5$  is a saddle point.

375 **Case (iii): The stability of boundary equilibrium points.** Substituting  $V_6 = (1, x'_2)$  into Eq.  
376 (38), and noting that

$$g(\eta, (1 - \eta)x'_2) = f(\eta, (1 - \eta)x'_2) - (1 + \delta)(1 - \eta)(1 - x'_2)\alpha = 0,$$

377 yields

$$J|_{V_6} = \begin{pmatrix} -f(\eta, (1 - \eta)x'_2) & 0 \\ x'_2(1 - x'_2)\frac{\partial g}{\partial x_1}|_{V_6} & x'_2(1 - x'_2)\frac{\partial g}{\partial x_2}|_{V_6} \end{pmatrix}.$$

378 Here, the term  $\frac{\partial g}{\partial x_2}|_{V_6}$  satisfies that

$$\frac{\partial g}{\partial x_2}|_{V_6} = (1 - \eta)\langle k \rangle \{ -2c\delta[\eta + x'_2(1 - \eta)] + c\delta - (b + 2S) + (1 + \delta)(\alpha + \beta) \}.$$

379 Moreover,  $x'_2$  satisfies the quadratic equation

$$\begin{aligned} & -c\delta(1 - \eta)^2(x'_2)^2 + x'_2[(1 - \eta)c\delta + (1 + \delta)(1 - \eta)(\alpha + \beta) - 2c\delta\eta(1 - \eta) \\ & - (1 - \eta)(b + 2S)] - c\delta\eta^2 + c\delta\eta - \eta(b + 2S) - (1 - \eta)(1 + \delta)\alpha + S = 0. \end{aligned}$$

380 Since  $f(\eta, (1 - \eta)x'_2) = (1 + \delta)\langle k \rangle(1 - \eta)(1 - x'_2)\alpha > 0$ , if one selects appropriate values  
381 for  $\alpha, \beta, c, S, \eta$  and  $\delta$  so that the roots  $x'_{2,\pm}$  with  $x'_{2,-} < x'_{2,+}$ , lie within the interval  $(0, 1)$ , it  
382 follows that  $\frac{\partial g}{\partial x_2}|_{(1, x'_{2,+})} < 0$  and  $\frac{\partial g}{\partial x_2}|_{(1, x'_{2,-})} > 0$ . Consequently, the equilibrium point  $(1, x'_{2,+})$   
383 is stable and  $(1, x'_{2,-})$  is a saddle point.

384 By substituting  $V_7 = (0, x'_2)$  into Eq. (38), and noting that

$$g(0, (1 - \eta)x'_2) = f(0, (1 - \eta)x'_2) - (1 + \delta)\langle k \rangle [1 - (1 - \eta)x'_2]\alpha = 0,$$

385 we obtain

$$J|_{V_7} = \begin{pmatrix} f(0, (1 - \eta)x'_2) & 0 \\ x'_2(1 - x'_2)\frac{\partial g}{\partial x_1}|_{V_7} & x'_2(1 - x'_2)\frac{\partial g}{\partial x_2}|_{V_7} \end{pmatrix}.$$

386 Here, the term  $\frac{\partial g}{\partial x_2}|_{V_7}$  satisfies that

$$\frac{\partial g}{\partial x_2}|_{V_7} = (1 - \eta)\langle k \rangle \{ -2c\delta x'_2(1 - \eta) + c\delta - (b + 2S) + (1 + \delta)(\alpha + \beta) \}.$$

387 Since  $f(0, (1 - \eta)x'_2) = (1 + \delta)\langle k \rangle [1 - (1 - \eta)x'_2]\alpha > 0$ ,  $V_7$  is unstable when  $\frac{\partial g}{\partial x_2}|_{V_7} > 0$  and  
388 becomes a saddle point when  $\frac{\partial g}{\partial x_2}|_{V_7} < 0$ .



389 Similarly, substituting  $V_8 = (x'_1, 0)$  into Eq. (38), and noting that  $f(\eta x'_1, 0) = 0$ , we have

$$J|_{V_8} = \begin{pmatrix} x'_1(1-x'_1)\frac{\partial f}{\partial x_1}|_{V_8} & x'_1(1-x'_1)\frac{\partial f}{\partial x_2}|_{V_8} \\ 0 & g(\eta x'_1, 0) \end{pmatrix}.$$

390 Since  $g(\eta x'_1, 0) = -(1+\delta)\langle k \rangle(1-x'_1\eta)\alpha < 0$ , the equilibrium point  $V_8$  is stable when  $\frac{\partial f}{\partial x_1}|_{V_8} < 0$   
 391 and becomes a saddle point when  $\frac{\partial f}{\partial x_1}|_{V_8} > 0$ .

392 Finally, we analyze the stability of the equilibrium point  $V_9$ . Since  $f(x'_1\eta, 1) = 0$ , the Jacobian  
 393 evaluated at  $V_9$  is given by

$$J|_{V_9} = \begin{pmatrix} x'_1(1-x'_1)\frac{\partial f}{\partial x_1}|_{V_9} & x'_1(1-x'_1)\frac{\partial f}{\partial x_2}|_{V_9} \\ 0 & -g(\eta x'_1, 1) \end{pmatrix}.$$

394 Since  $g(\eta x'_1, 1) = -(1+\delta)\langle k \rangle\eta(1-x'_1)\alpha < 0$ , it follows that the equilibrium  $V_9$  is unstable  
 395 when  $\frac{\partial f}{\partial x_1}|_{V_9} > 0$ , and becomes a saddle point when  $\frac{\partial f}{\partial x_1}|_{V_9} < 0$ .

396 In fact, the behavior of  $V_7$ ,  $V_8$  and  $V_9$  is analogous to that of  $V_6$ . The unknowns  $x'_1$  and  $x'_2$  are  
 397 determined by a quadratic function with a negative leading coefficient. Setting this function  
 398 equal to zero, the existence of roots within the interval  $(0,1)$  confirms the presence of the cor-  
 399 responding equilibria  $V_7$ ,  $V_8$  and  $V_9$ . Furthermore, analyzing the sign of the derivative at these  
 400 roots determines the stability of each equilibrium.

## 401 References

- 402 [1] F. C. Santos, J. M. Pacheco, and T. Lenaerts. Evolutionary dynamics of social dilemmas in  
 403 structured heterogeneous populations. *Proc. Natl. Acad. Sci. U. S. A.*, 103(9): 3490–3494,  
 404 2006.
- 405 [2] A. Traulsen, M. A. Nowak, and J. M. Pacheco. Stochastic dynamics of invasion and fixa-  
 406 tion. *Phys. Rev. E*, 74: 011909, 2006.
- 407 [3] N. G. Van Kampen. *Stochastic processes in physics and chemistry*. Elsevier, 1992.
- 408 [4] A. Civilini, O. Sadekar, et al. Explosive Cooperation in Social Dilemmas on Higher-Order  
 409 Networks. *Phys. Rev. Lett.*, 132: 167401, 2024.
